# Supplementary material
Source: PubMed Central journal article supplement (PMC2633582)
Supplement: 0811018106_0811018106SI.pdf [file 0811018106_0811018106SI.pdf]

# Supporting Information

Nanduri et al. 10.1073/pnas.0811018106

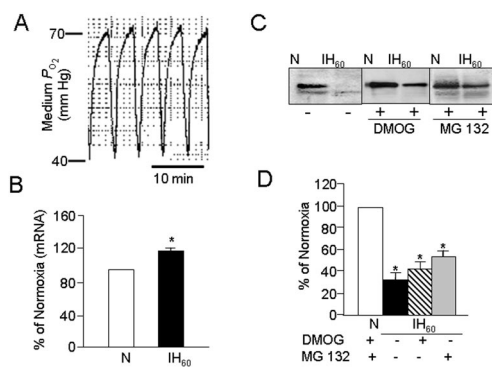

**Fig. S1.** (A). Representative tracing of the PO<sub>2</sub> changes in the cell culture during exposure to intermittent hypoxia. PO<sub>2</sub> was measured by an O<sub>2</sub>-sensitive electrode (Lazar) placed near the cells. During normoxia, ambient PO<sub>2</sub> was ≈140 mmHg, whereas medium PO<sub>2</sub> in presence of 10<sup>6</sup> cells was ≈70 mmHg as a result of O<sub>2</sub> consumption. During each episode of hypoxia, medium PO<sub>2</sub> decreased by ≈30 mmHg. (B) Effect of IH<sup>60</sup> on HIF-2α mRNA expression (*n* = 3). (C and D) Effect of 5 μM MG132, a proteosomal inhibitor, and 1 mM DMOG, an inhibitor of PHDs, on IH<sup>60</sup>-evoked HIF-2α degradation in PC12 cells (*n* = 5). The data presented are mean ± SEM. \**P* < 0.05 vs. respective normoxic controls expressed as 100%.
